# Supplementary material for: The Prebiotic Effect of Australian Seaweeds on Commensal Bacteria and Short Chain Fatty Acid Production in a Simulated Gut Model
Source: Nutrients. 2022 May 23;14(10):2163. doi: 10.3390/nu14102163 (PMC9146517; doi:10.3390/nu14102163)
Supplement: Supplementary file 1 [file nutrients-14-02163-s001.zip › nutrients-1733549-supplementary.pdf]

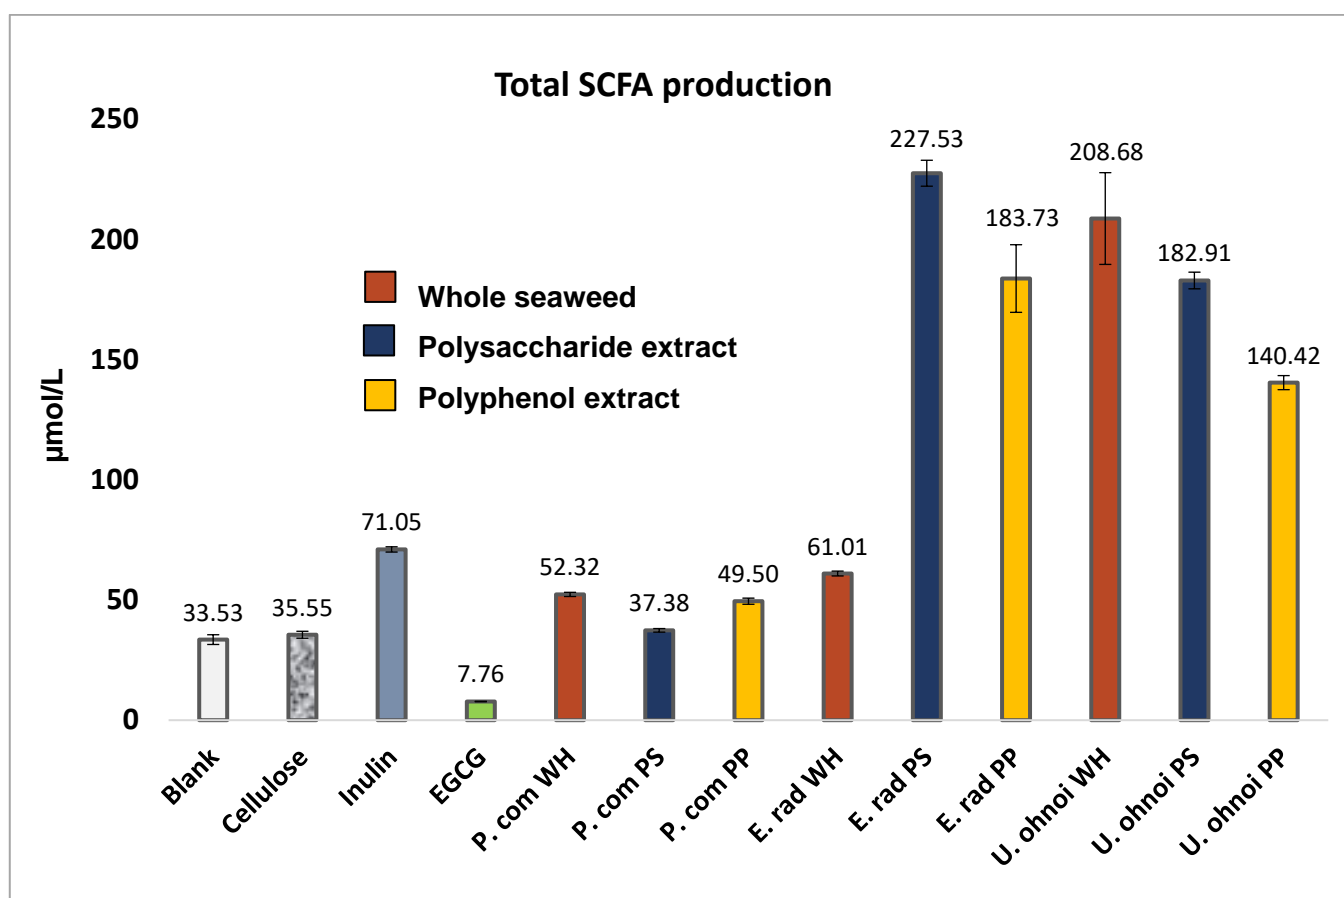

Figure S1. Total short chain fatty acid production by bacteria after 24 hr fermentation with *U. ohnoi*, *E. radiata* or *P. comosa* whole, polysaccharide or polyphenol extracts, compared to SCFA production by bacteria fermented with inulin, epigallocatechin gallate, cellulose, or basal media only (blank).

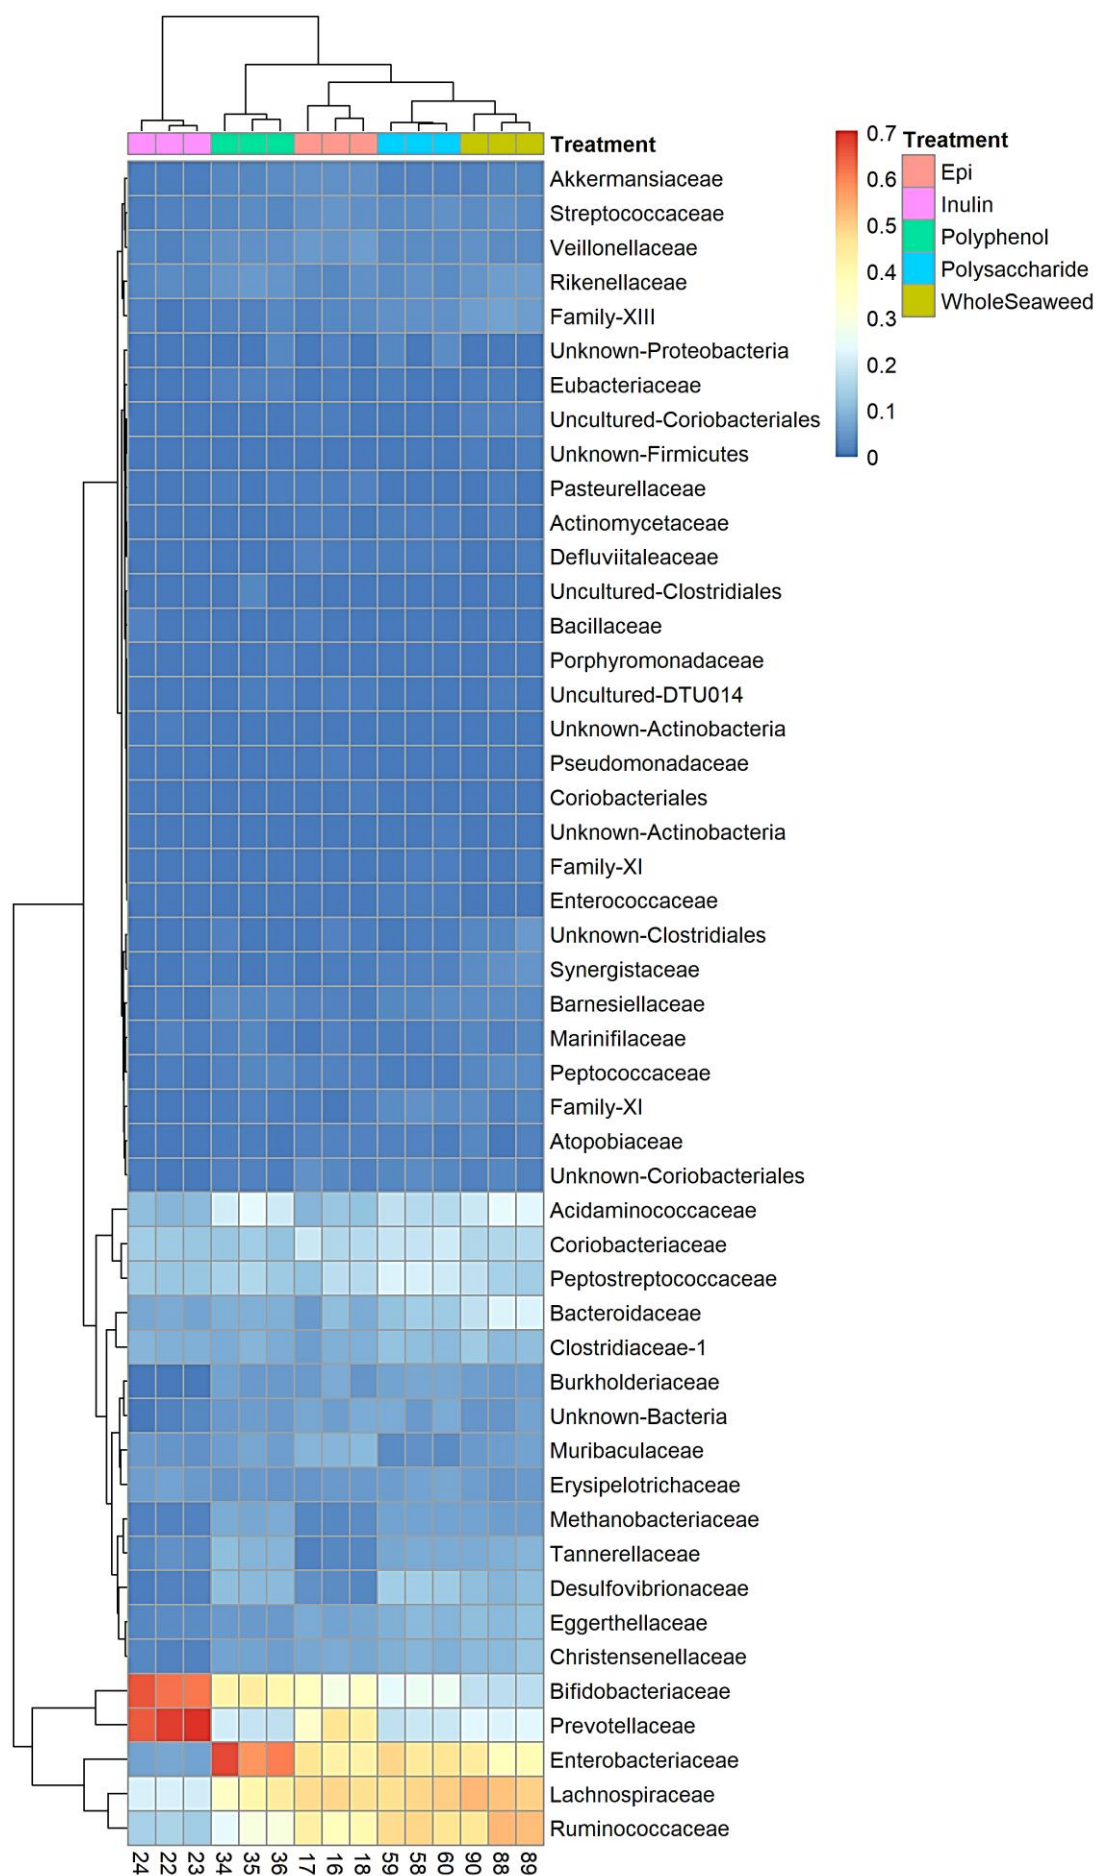

Figure S2. Heat map of *P. comosa* influence on bacterial family abundance versus INU and EGCG controls

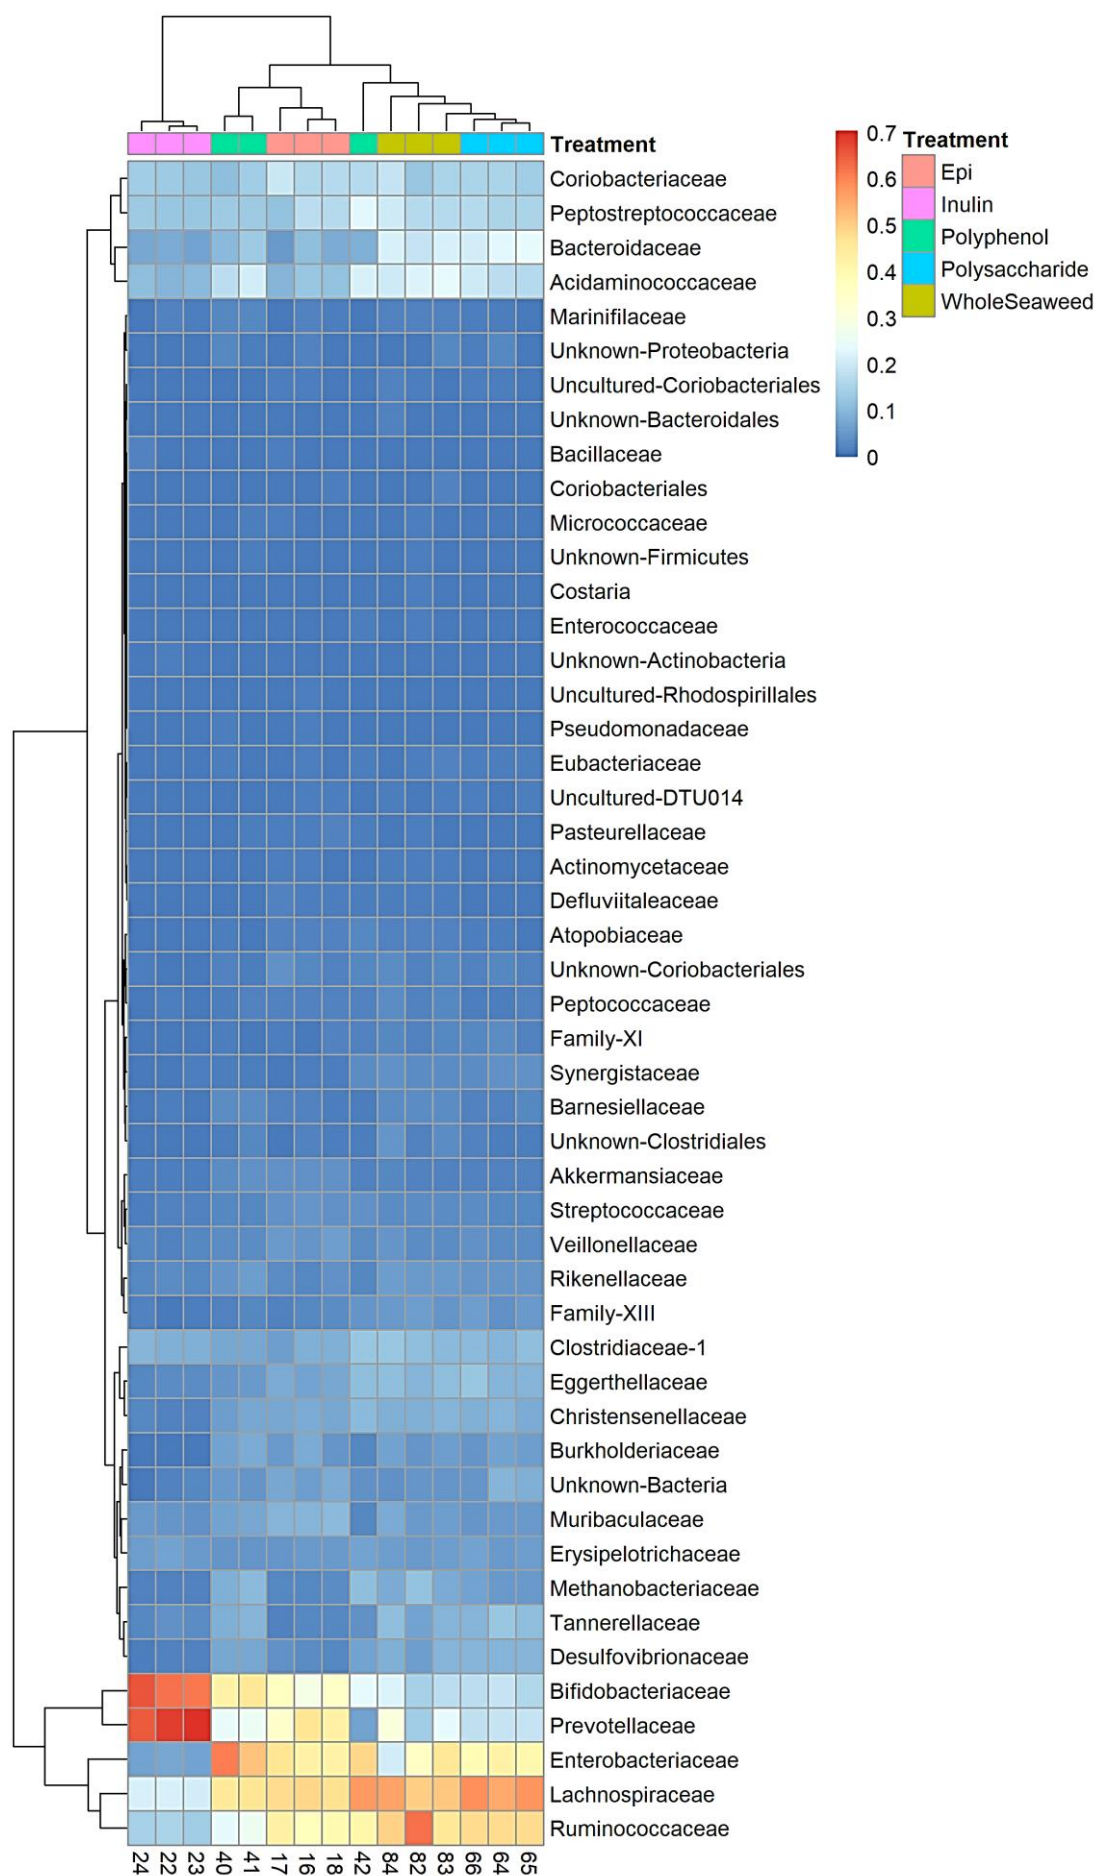

Figure S3. Heat map of *E. radiata* influence on bacterial family abundance versus INU and EGCG controls.

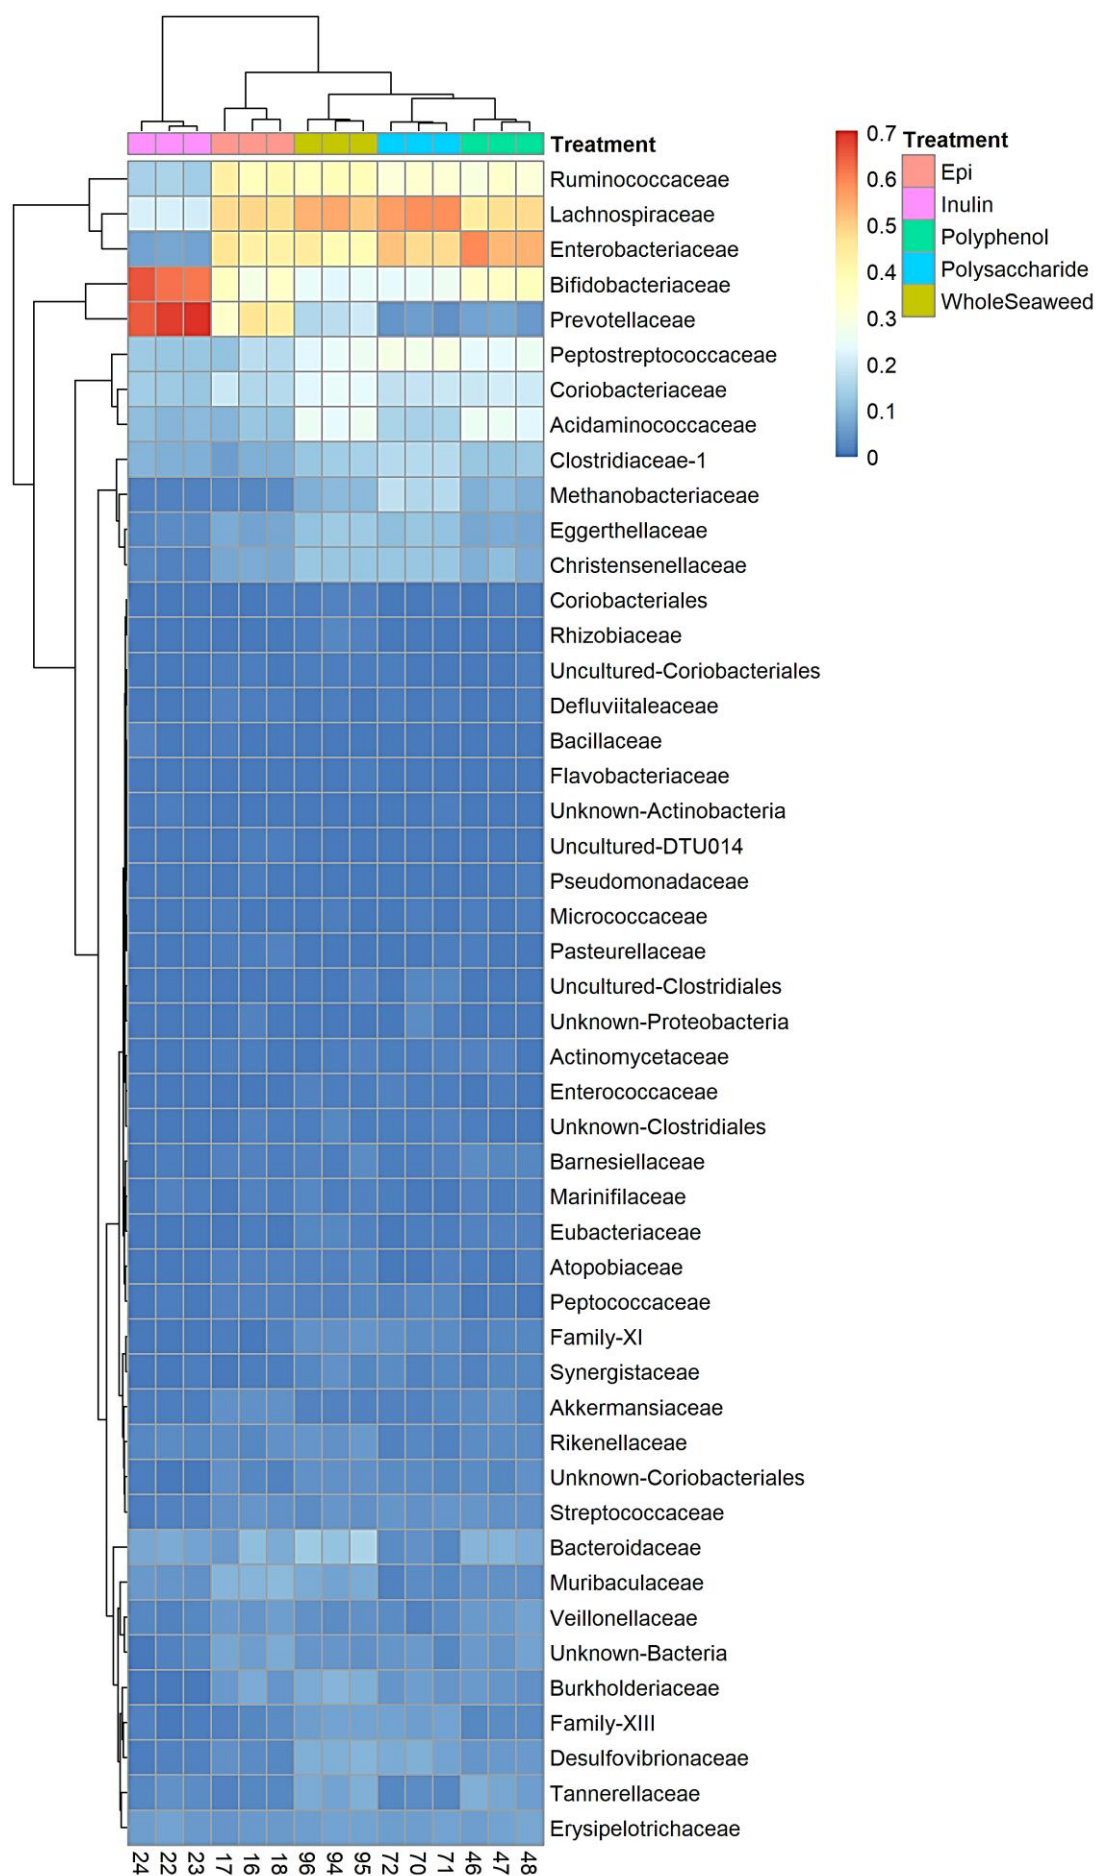

Figure S4. Heat map of *U. ohnoi* influence on bacterial family abundance versus INU and EGCG controls.

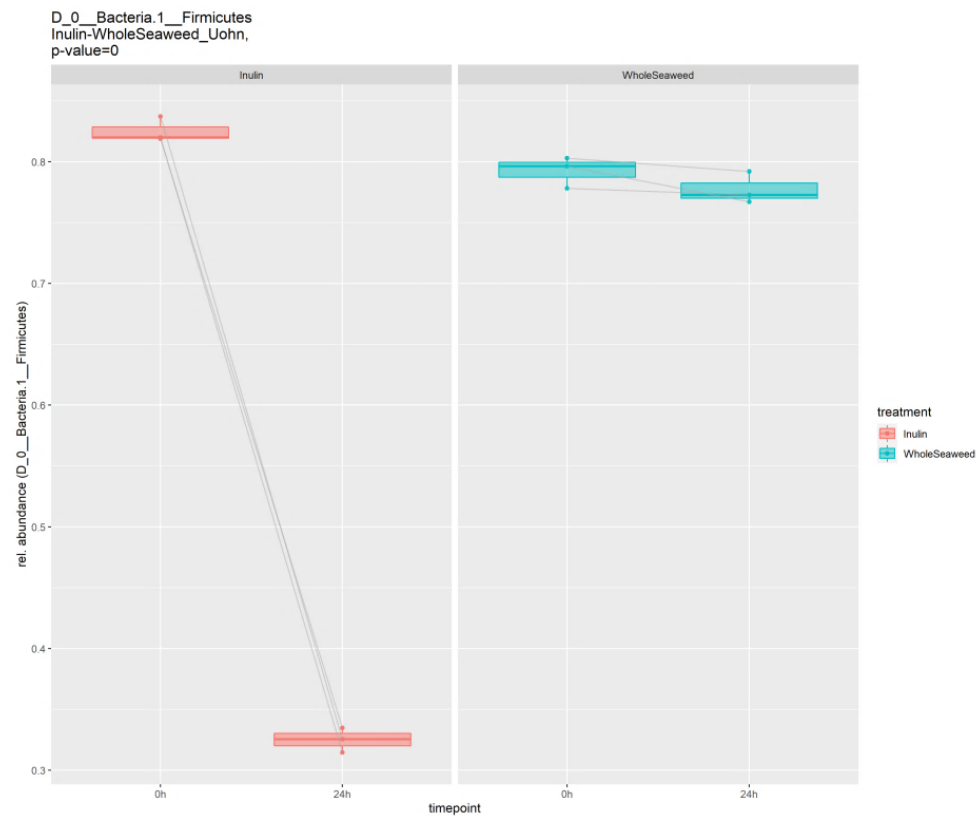

Figure S5. *U. ohnoi* WH enhanced phylum Firmicutes ( $P = 0$ ) vs INU

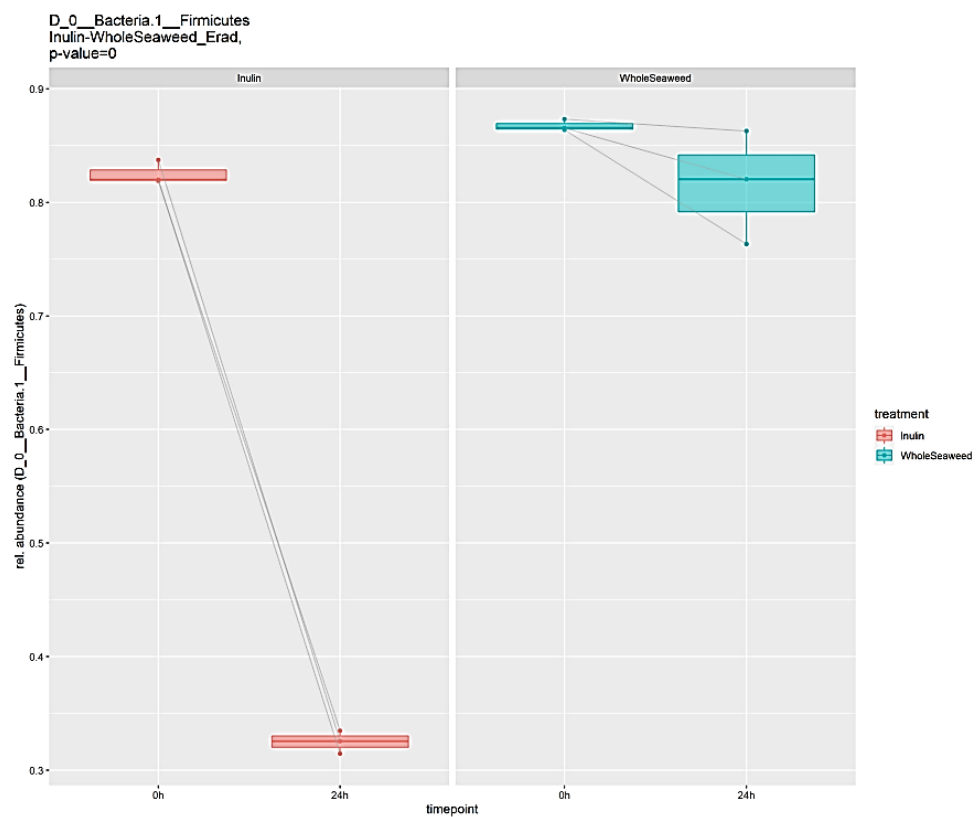

Figure S6. *E. radiata* WH enhanced phylum Firmicutes ( $P = 0$ ) vs INU

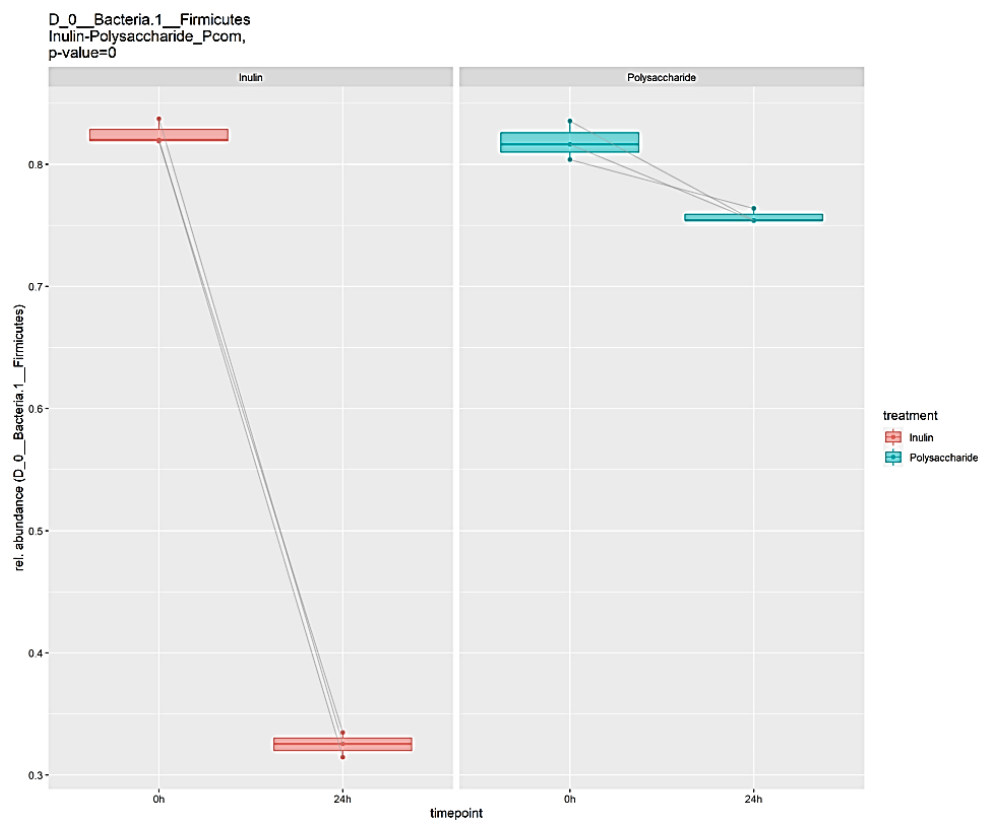

Figure S7. *P. comosa* PS enhanced phylum Firmicutes ( $P = 0$ ) vs INU

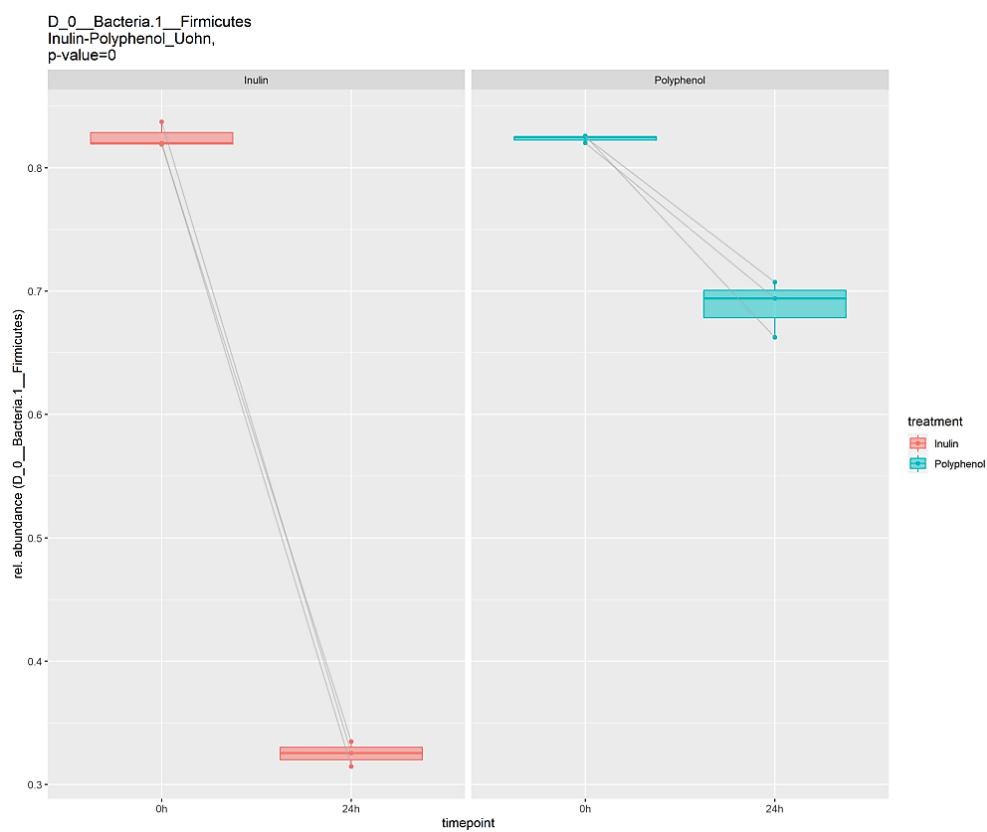

Figure S8. *U. ohnoi* PP enhanced phylum Firmicutes ( $P = 0$ ) vs INU

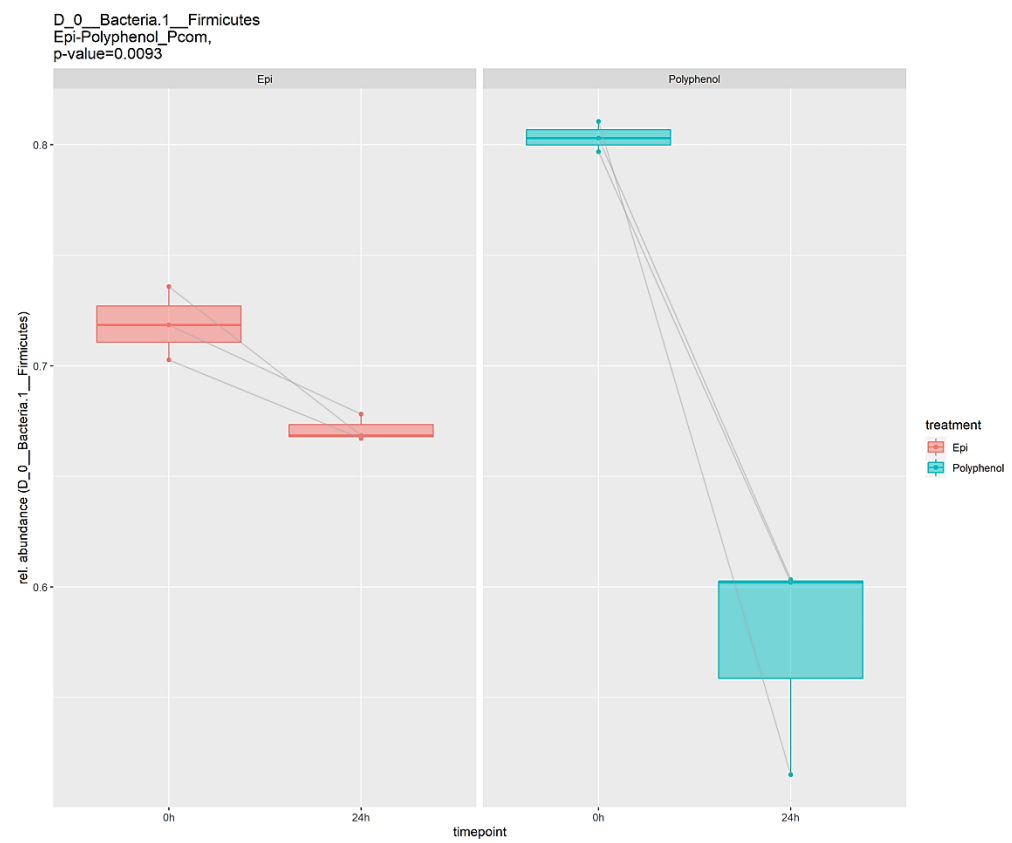

Figure S9. *P. comosa* PP was the only sample that reduced phylum Firmicutes ( $P = 0.0093$ ) vs EGCG

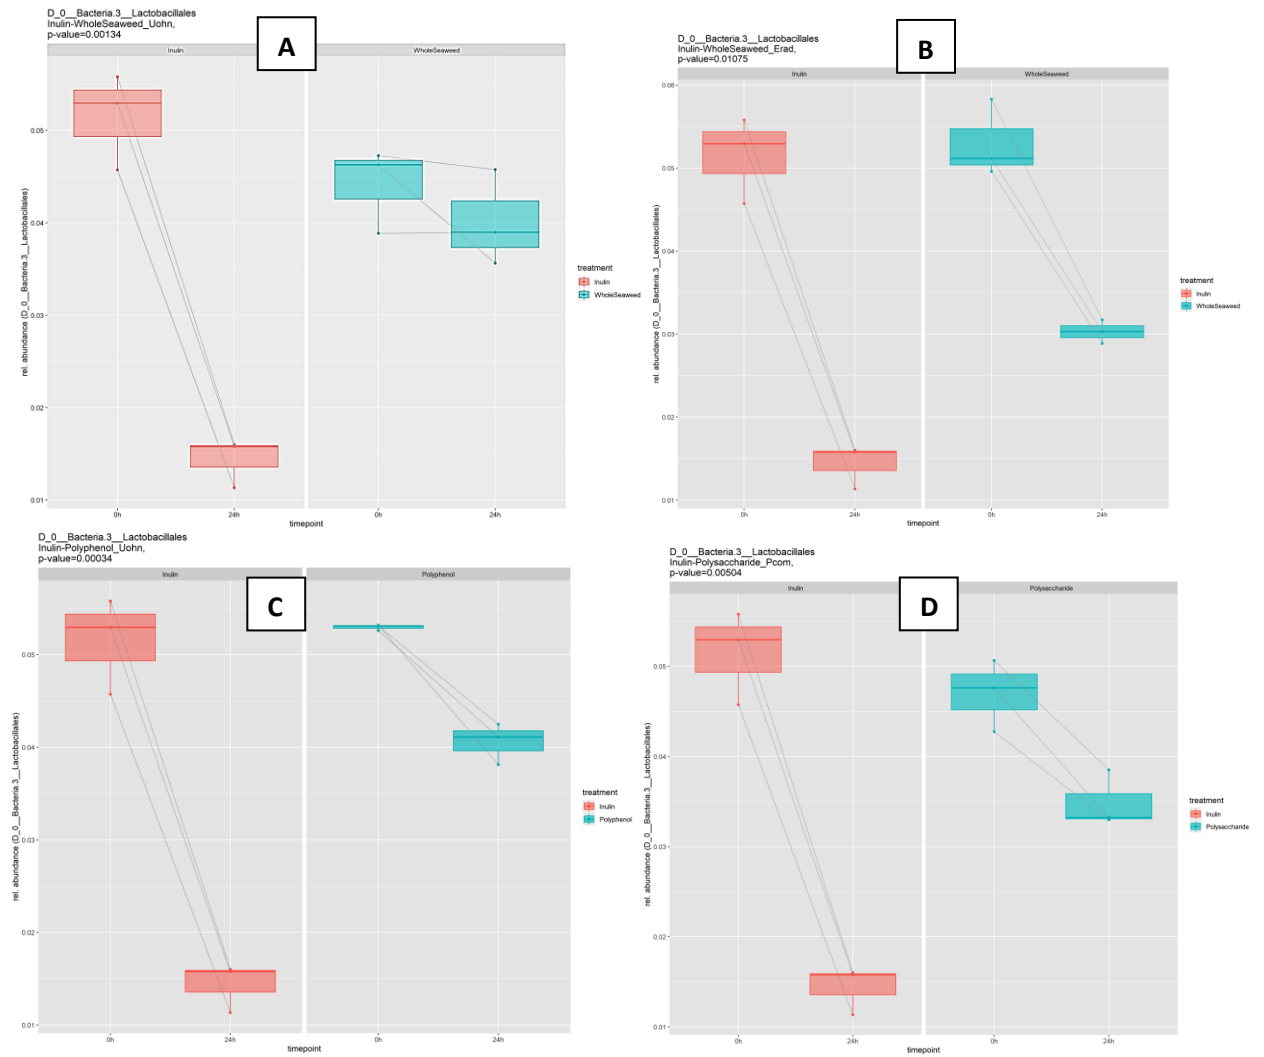

Figure S10. All WH, PS and PP seaweed substrates enhanced the abundance of order Lactobacillales compared to INU. Examples shown are (A) *U. ohnoi* WH ( $P = 0.00134$ ), (B) *E. radiata* WH ( $P = 0.01075$ ), (C) *U. ohnoi* PP ( $P = 0.00034$ ) and (D) *P. comosa* PS ( $P = 0.00504$ ) vs INU.

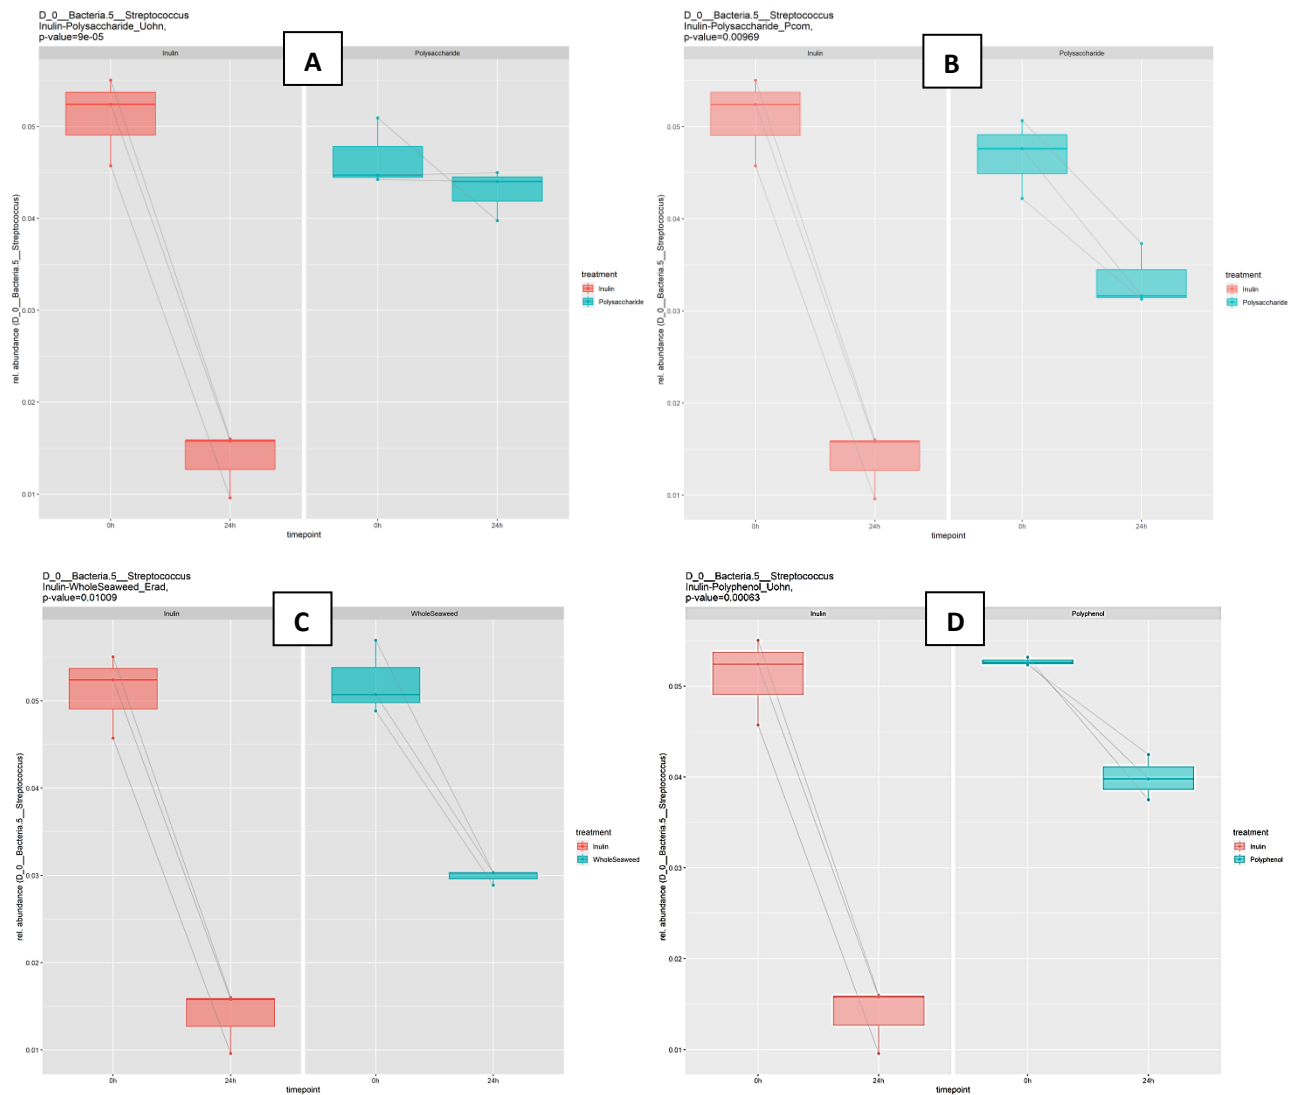

Figure S11. Genus *Streptococcus* increased significantly compared to INU in all WH, PS and PP extracts. Examples of enhancement shown are (A) *U. ohnoi* PS ( $P = 0.05 \times 10^{-9}$ ), (B) *P. comosa* PS ( $P = 0.00969$ ), (C) *E. radiata* WH ( $P = 0.01009$ ) and (D) *U. ohnoi* PP ( $P = 0.00063$ ) vs INU

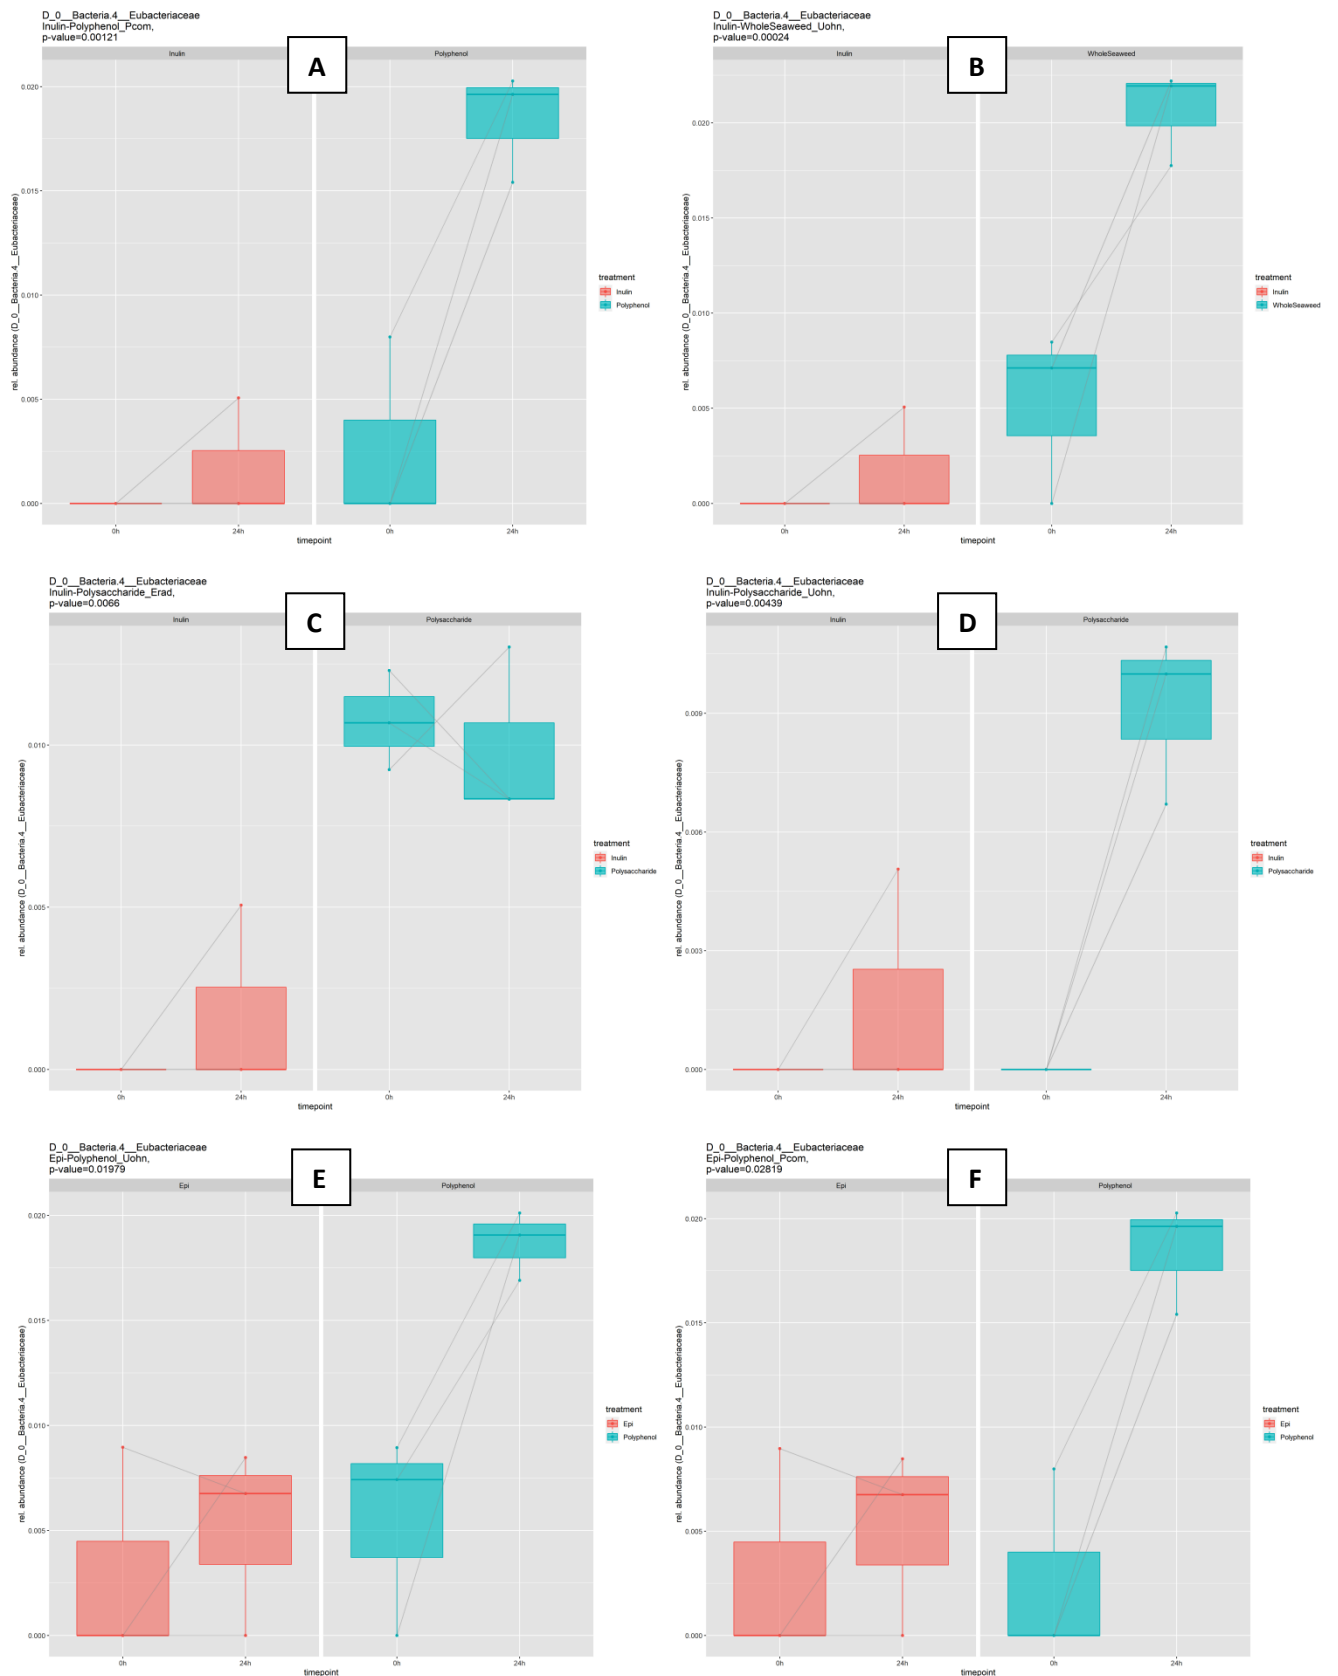

Figure S12. The abundance of the family Eubacteriaceae was enhanced by all WH, PS, and PP extracts compared to INU and EGCG (with the exception of *E. radiata* PP vs EGCG where there was no significant increase). Examples shown are (A) *P. comosa* PP ( $P = 0.00121$ ), (B) *U. ohnoi* WH ( $P = 0.00024$ ), (C) *E. radiata* PS ( $P = 0.0066$ ) and (D) *U. ohnoi* PS ( $P = 0.000439$ ) vs INU. (E) *U. ohnoi* PP ( $P = 0.01979$ ) and (F) *P. comosa* PP ( $P = 0.02819$ ) vs EGCG

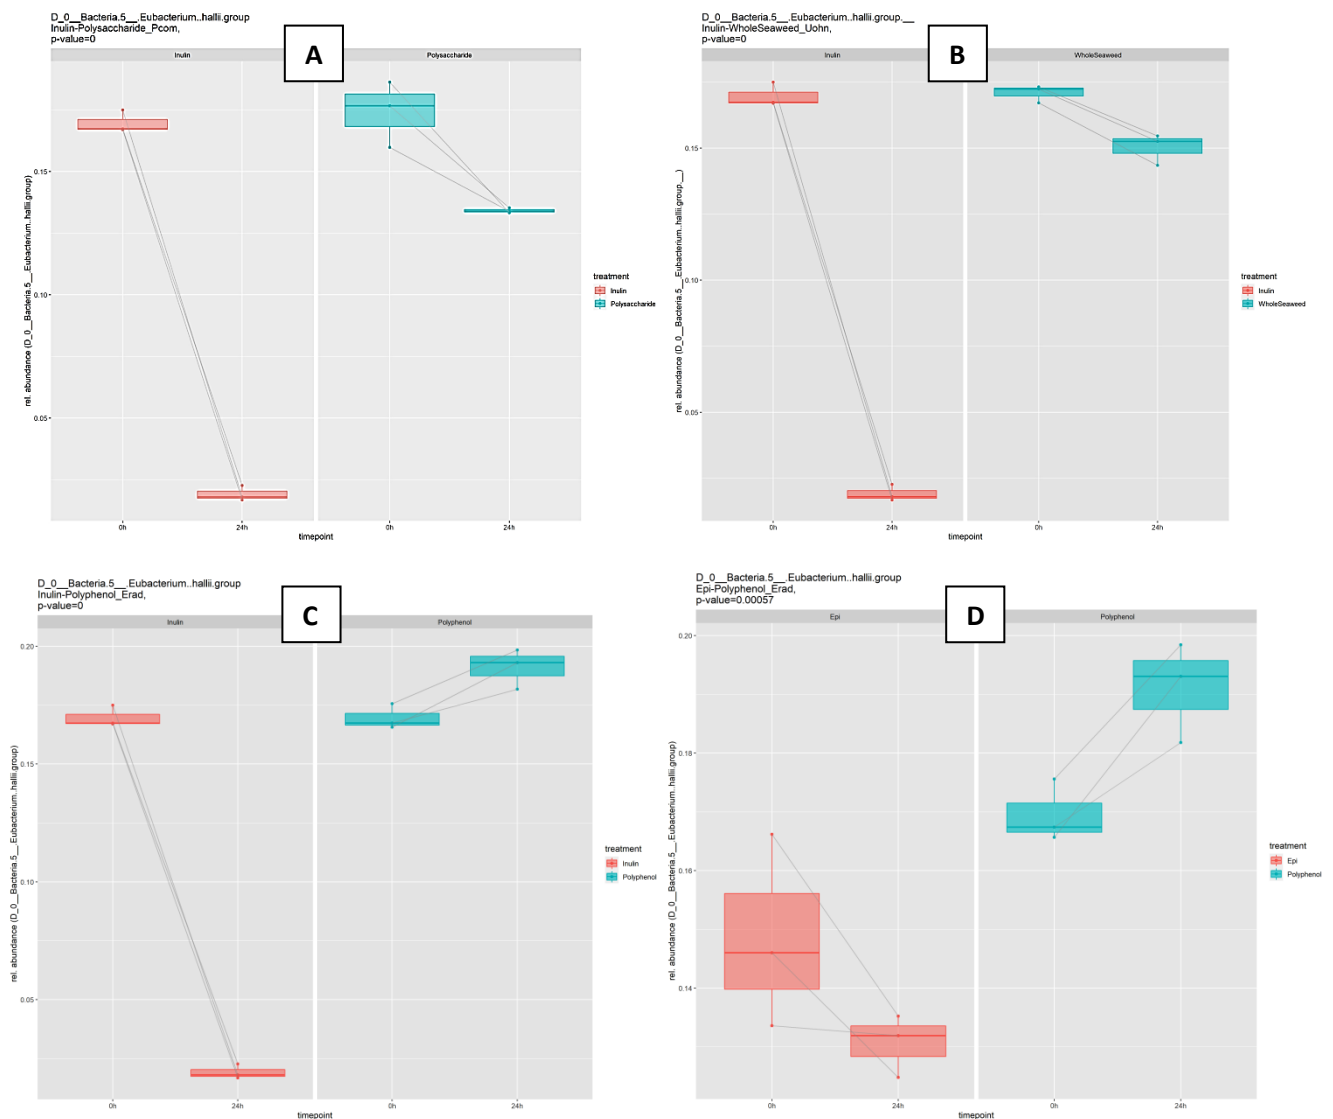

Figure S13. The abundance of the species *Eubacterium halii* was enhanced significantly by all WH, PS, and PP extracts compared to INU. Only *E. radiata* PP increased abundance compared to EGCG. Examples shown are (A) *P. comosa* PS ( $P = 0$ ), (B) *U. ohnoi* WH ( $P = 0$ ) and (C) *E. radiata* PP ( $P = 0$ ) vs INU. (D) *E. radiata* PP ( $P = 0.00057$ ) was the only polyphenol extract that enhanced abundance more so than the EGCG control.

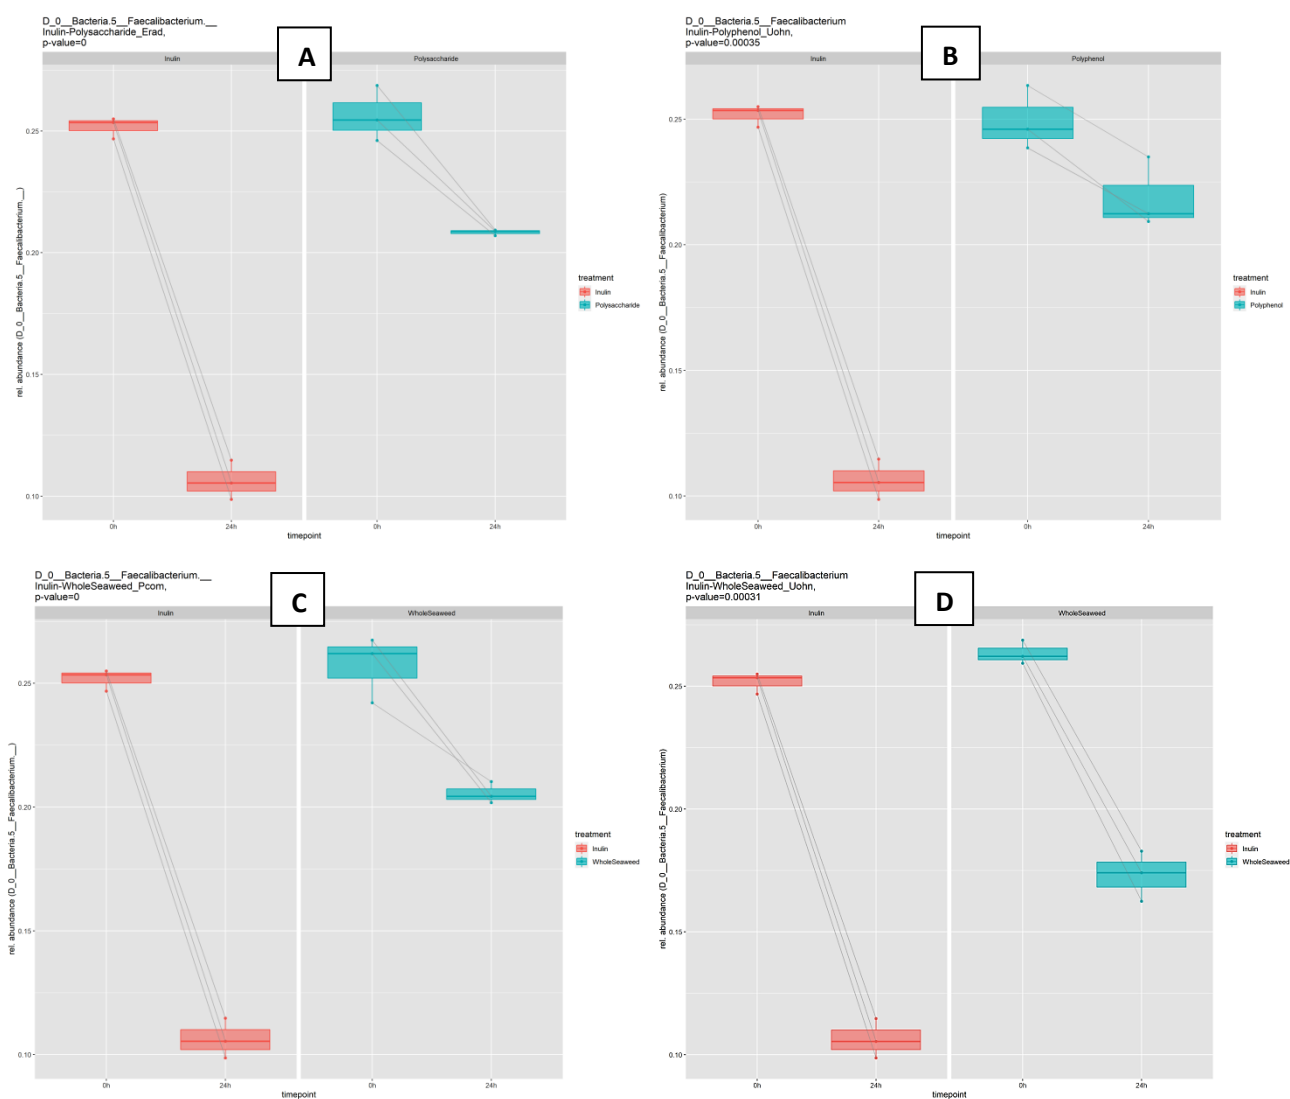

Figure S14. Genus *Faecalibacterium* increased significantly compared to INU in all WH, PS and PP extracts. Examples of enhancement shown are (A) *E. radiata* PS ( $P = 0$ ), (B) *U. ohnoi* PP ( $P = 0.00035$ ), (C) *P. comosa* WH ( $P = 0$ ) and (D) *U. ohnoi* WH ( $P = 0.00031$ ) vs INU

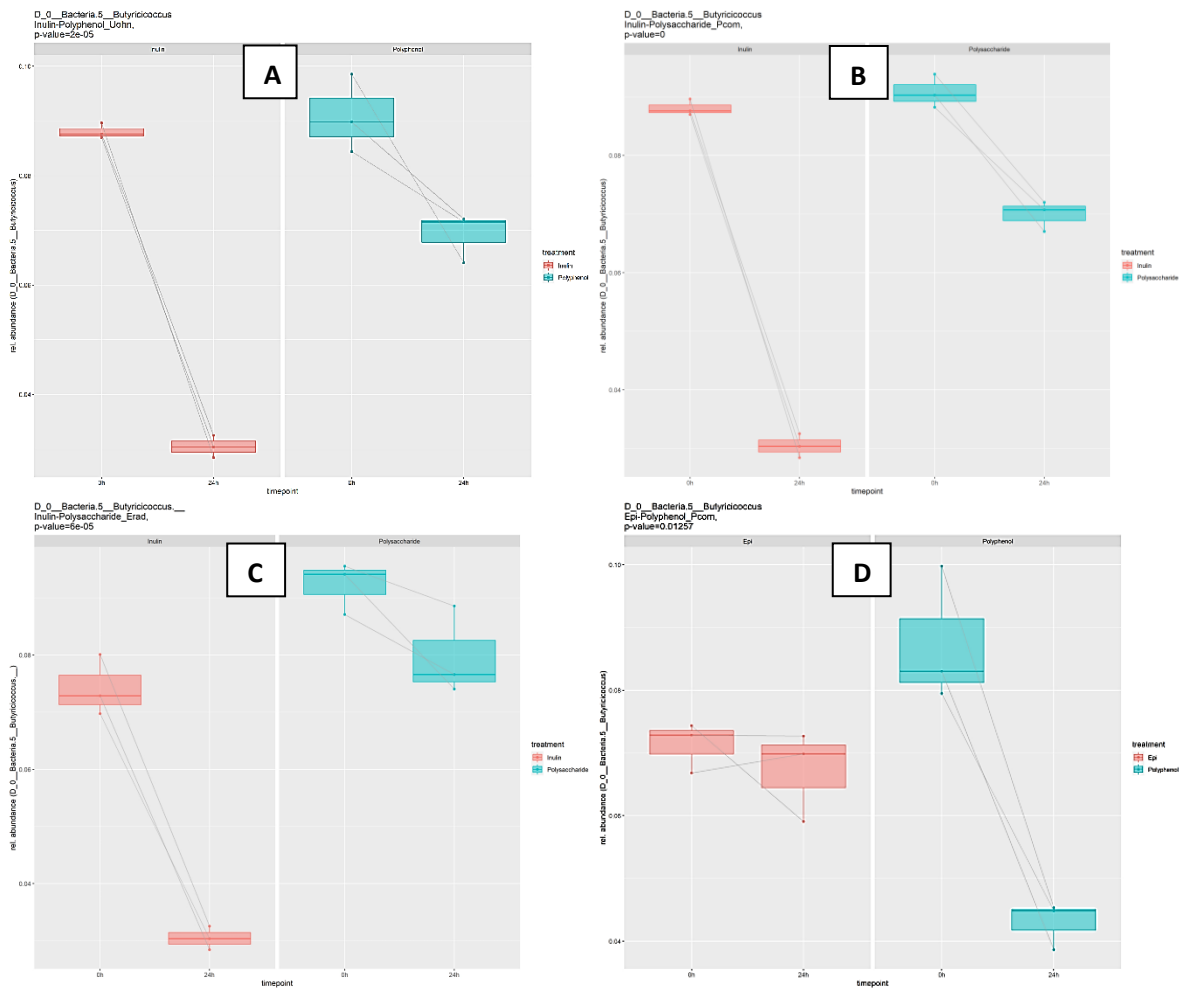

Figure S15. Compared to INU, genus *Butyricicoccus* was enhanced by all WH and PS ferments, but decreased compared to EGCG. Examples of enhancement shown are (A) *U. ohnoi* PP ( $P = 0.00002$ ), (B) *P. comosa* PS ( $P = 0$ ) and (C) *E. radiata* PS ( $P = 0.00006$ ) vs INU, and (D) reduction by *P. comosa* PP vs EGCG ( $P = 0.01257$ )

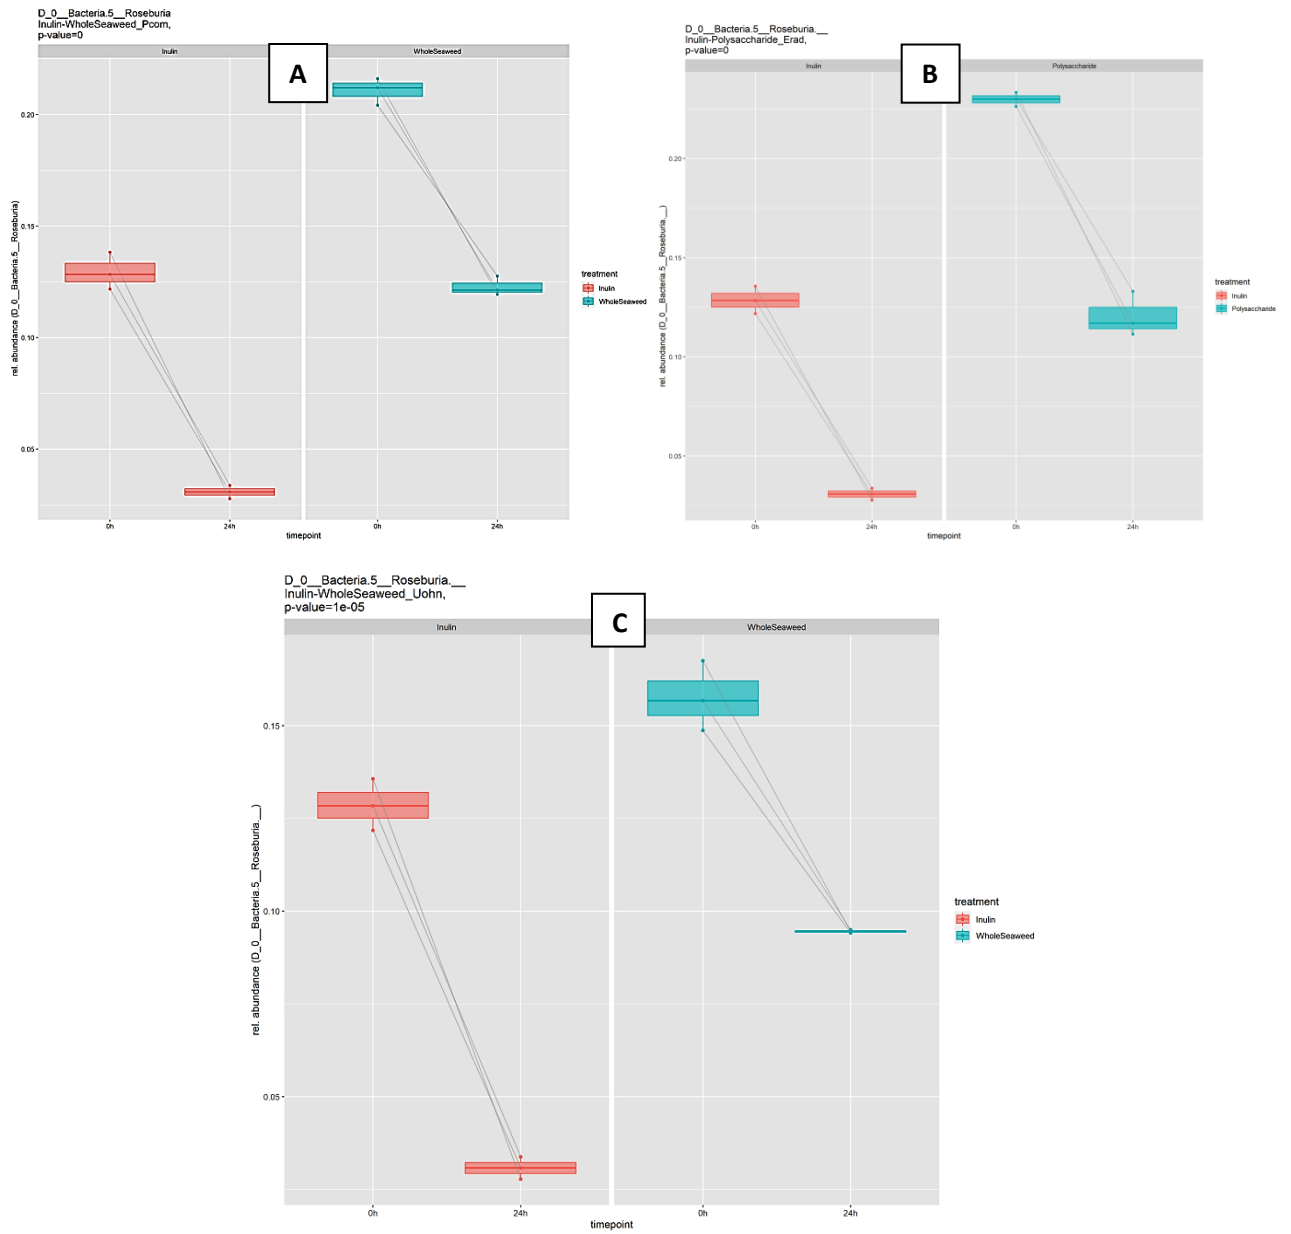

Figure S16. Genus *Roseburia* was enhanced by all WH and PS ferments but not by PP. Examples shown are (A) *P. comosa* PS (P = 0), (B) *E. radiata* PS (P = 0) and (C) *U. ohnoi* WH (P = 0.00001) vs INU

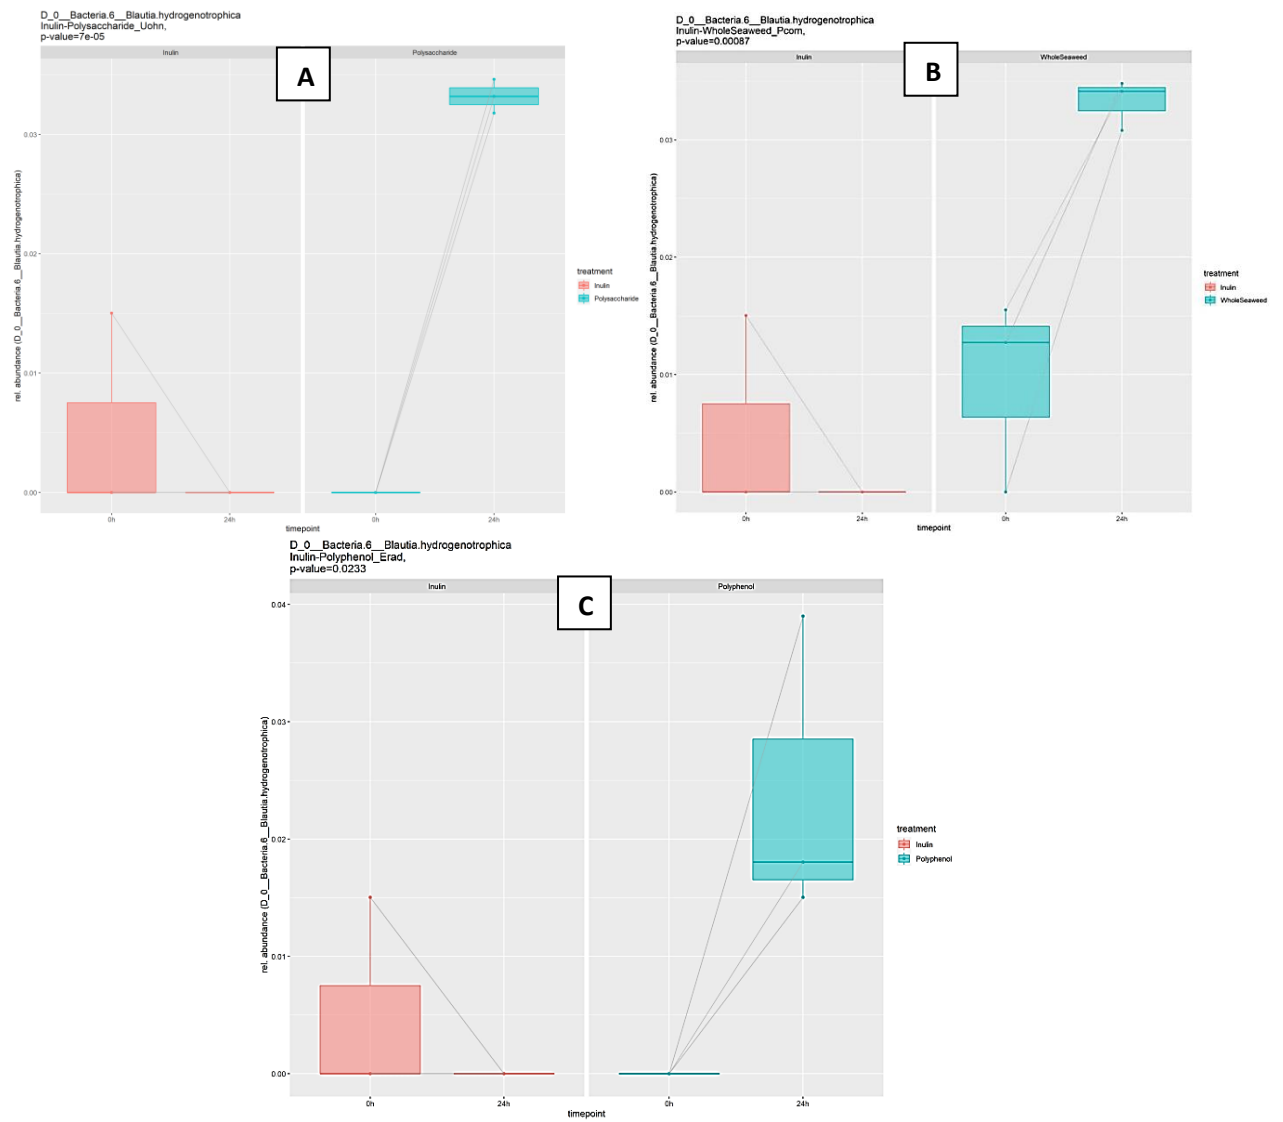

Figure S17. (A) *U. ohnoi* PS ( $P = 0.00007$ ), (B) *P. comosa* WH ( $P = 0.00087$ ) and (C) *E. radiata* PP ( $P = 0.0233$ ) enhanced *Blautia hydrogenotrophica* abundance compared to INU

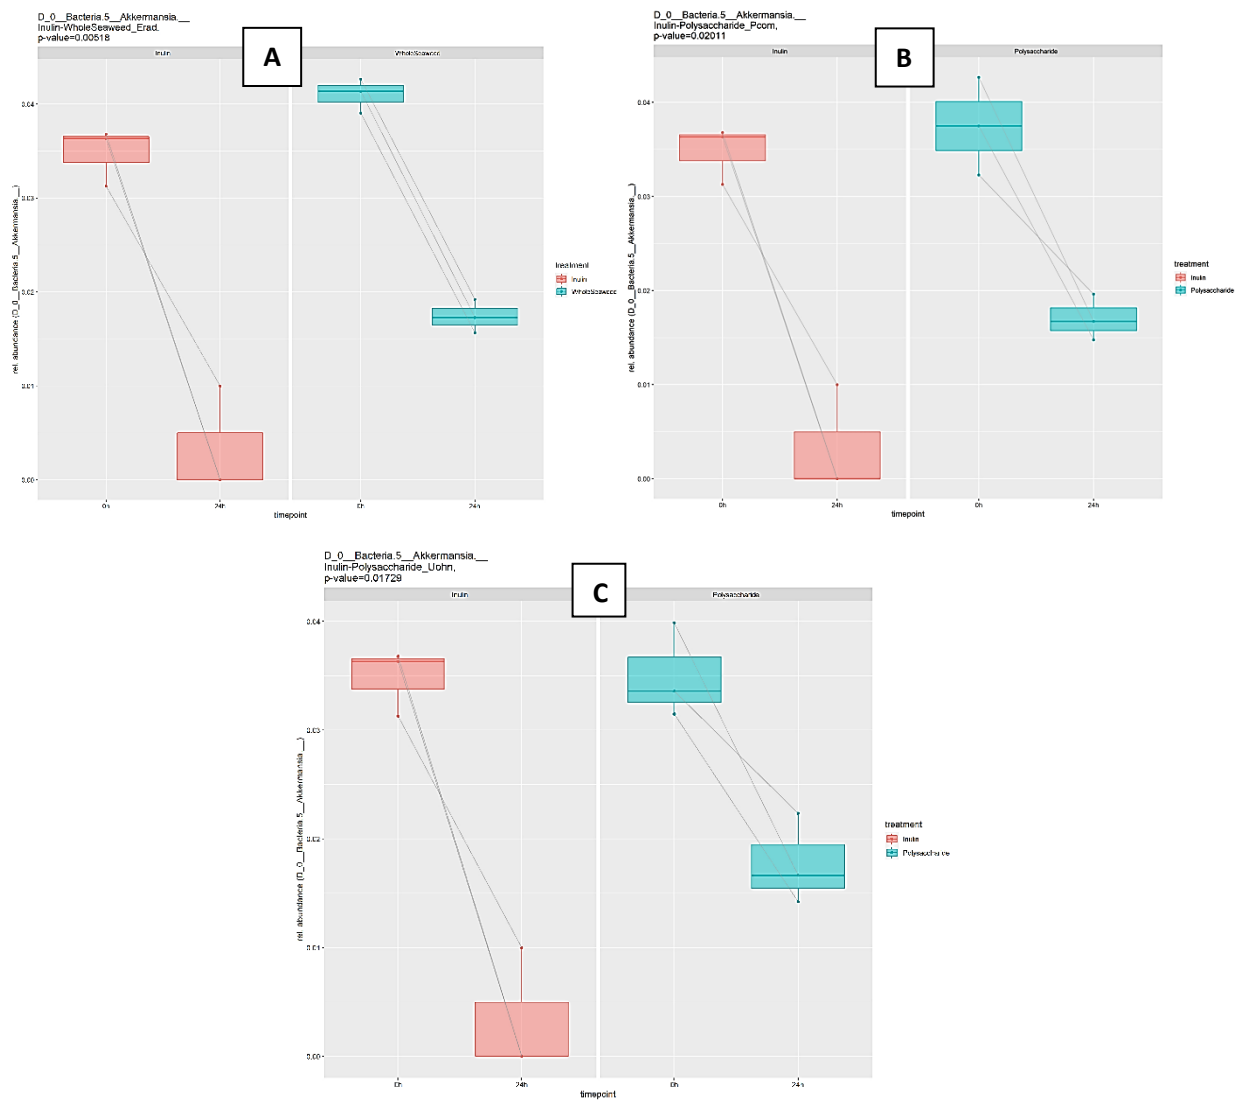

Figure S18. Genus *Akkermansia* was enhanced by all WH and PS ferments but not by PP. Examples shown are (A) *E. radiata* WH (0.00518), (B) *P. comosa* PS (P = 0.02011) and (C) *U. ohnoi* PS vs INU

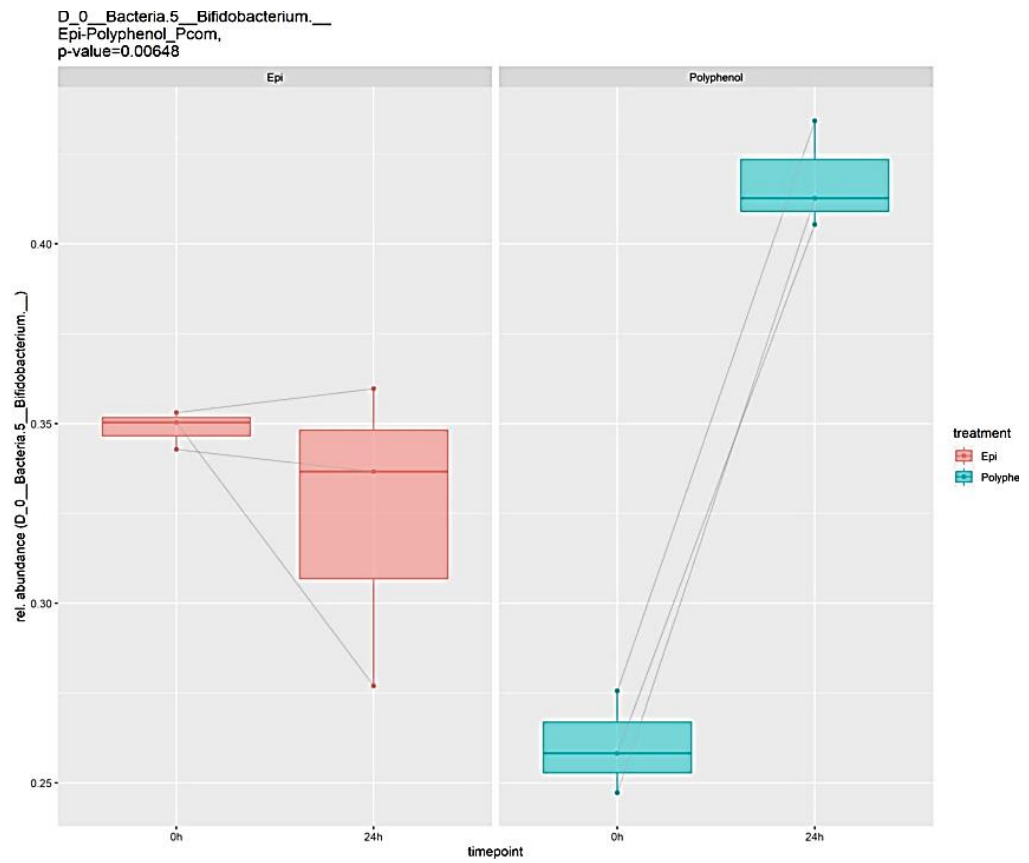

Figure S19. *P. comosa* PP was the only seaweed substrate to enhance Bifidobacteria compared to the EGCG control ( $P = 0.00648$ )

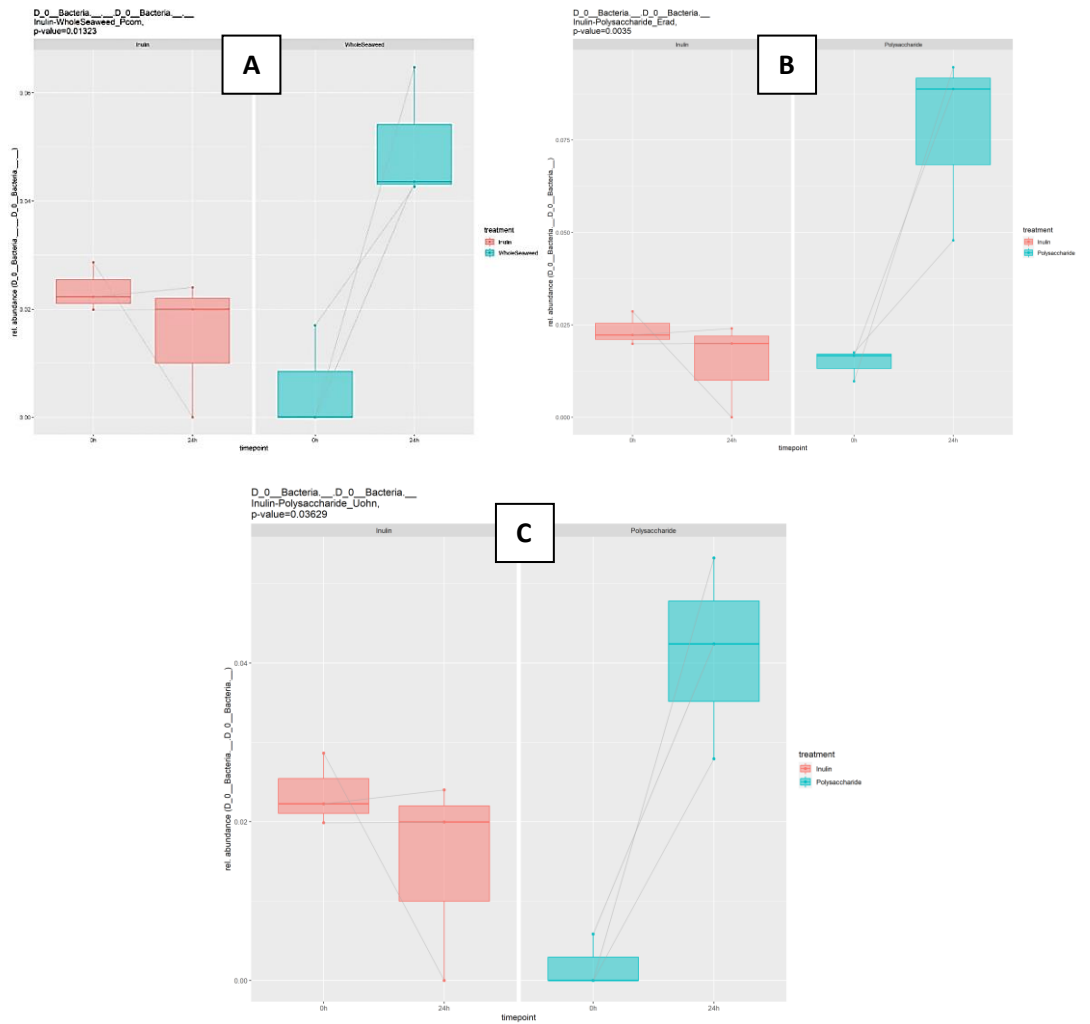

Figure S20. All PS and WH seaweed substrates increased the abundance of the phylum of unclassified 'Bacteria' *vs* INU suggesting that species richness was enhanced. Examples shown are (A) *P. comosa* WH (P = 0.01323), (B) *E. radiata* PS (P = 0.0035) and (C) *U. ohnoi* PS (P = 0.03629)

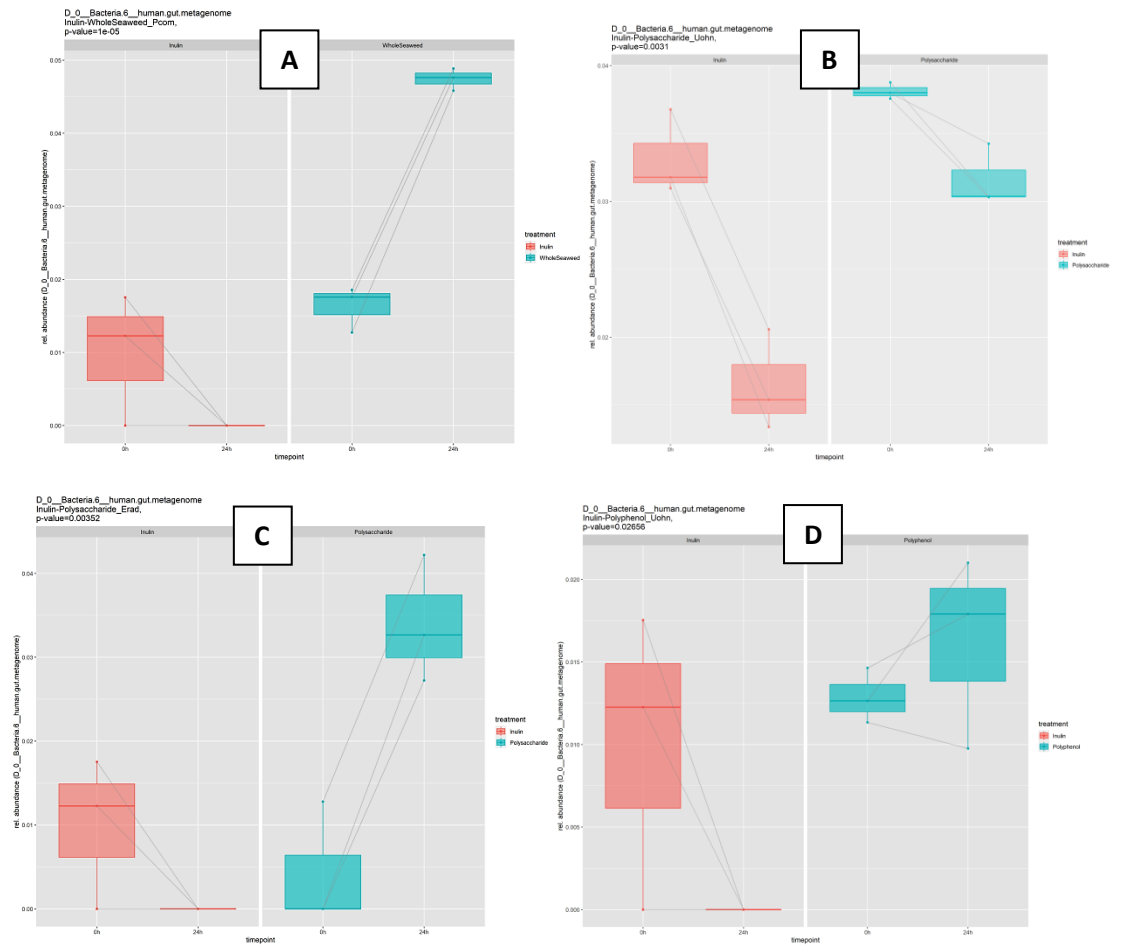

Figure S21. Human gut metagenome abundance was enhanced by all nine seaweed ferments *vs* INU. Examples shown are (A) *P. comosa* WH ( $P = 0.00001$ ), (B) *U. ohnoi* PS ( $P = 0.0031$ ), (C) *E. radiata* PS ( $P = 0.00352$ ) and (D) *U. ohnoi* PP ( $P = 0.02656$ )

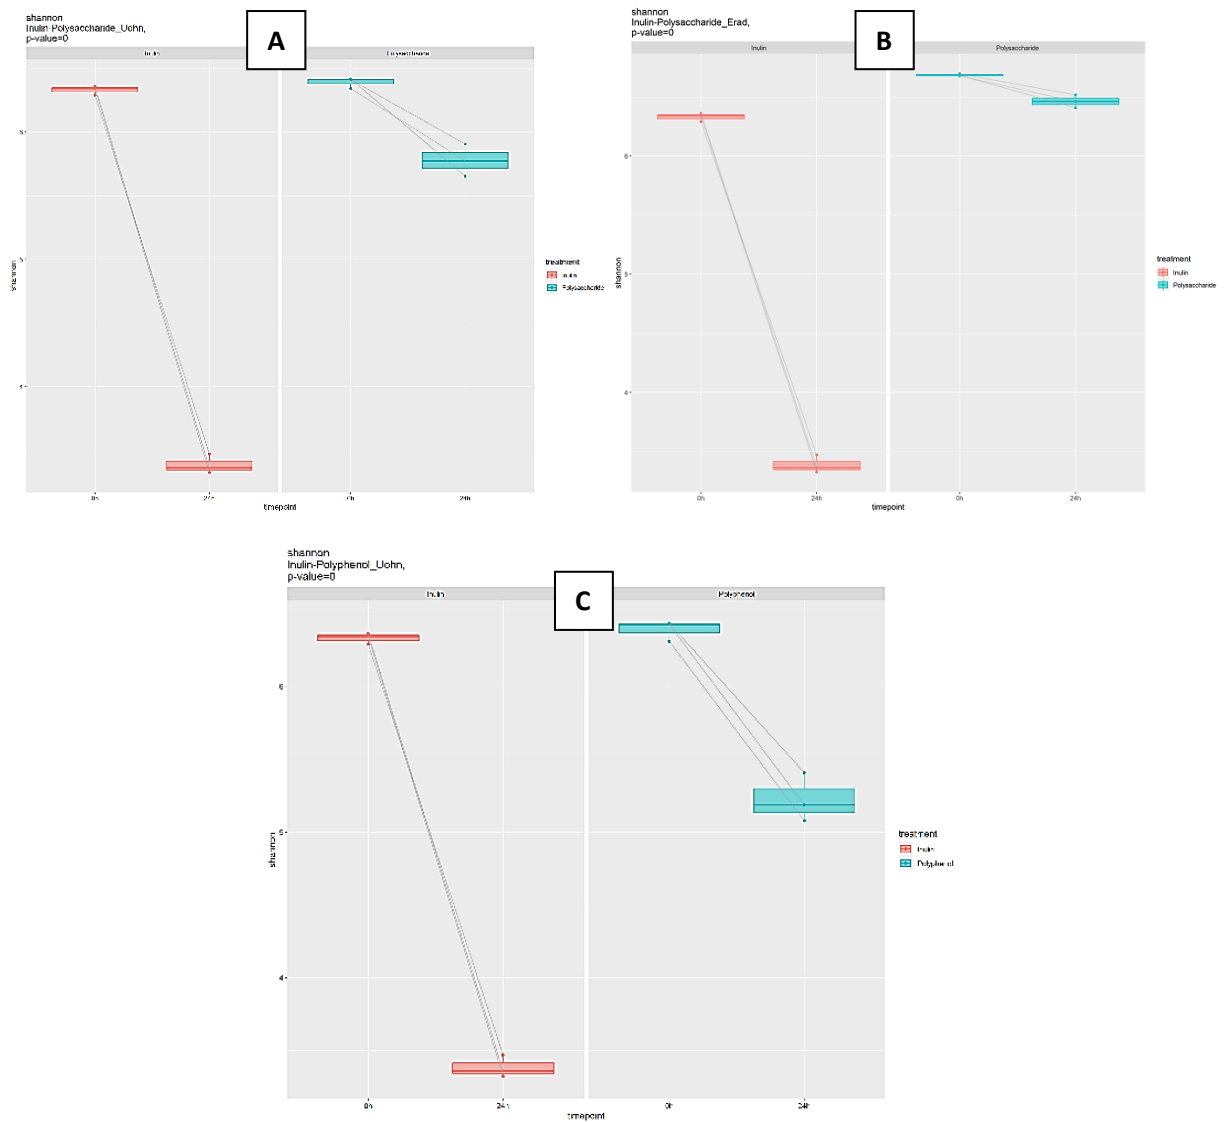

Figure S22. Shannon diversity index increased in all seaweed ferments *vs* INU. Examples shown are (A) *U. ohnoi* PS *vs* INU ( $P = 0$ ), (B) *E. radiata* PS *vs* INU (C) and *U. ohnoi* PP *vs* INU ( $P = 0$ )

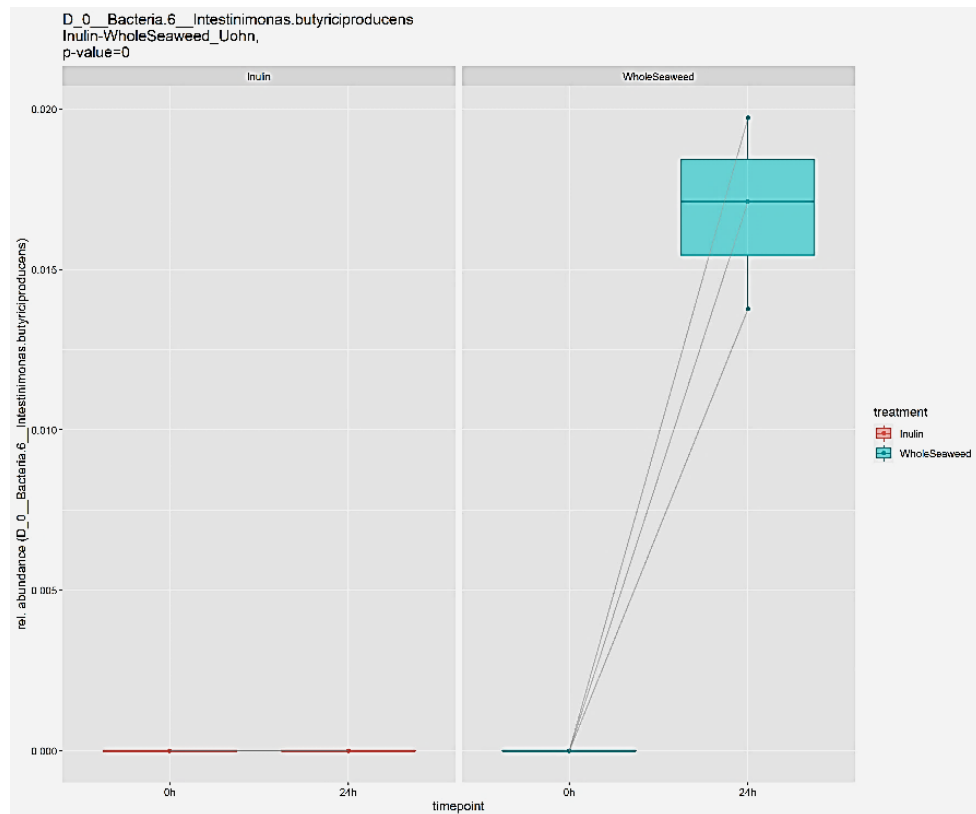

Figure S23. *Intestinimonas butyriciproducens* of the phylum Firmicutes was enhanced by *U. ohnoi* WH vs INU ( $P = 0$ )

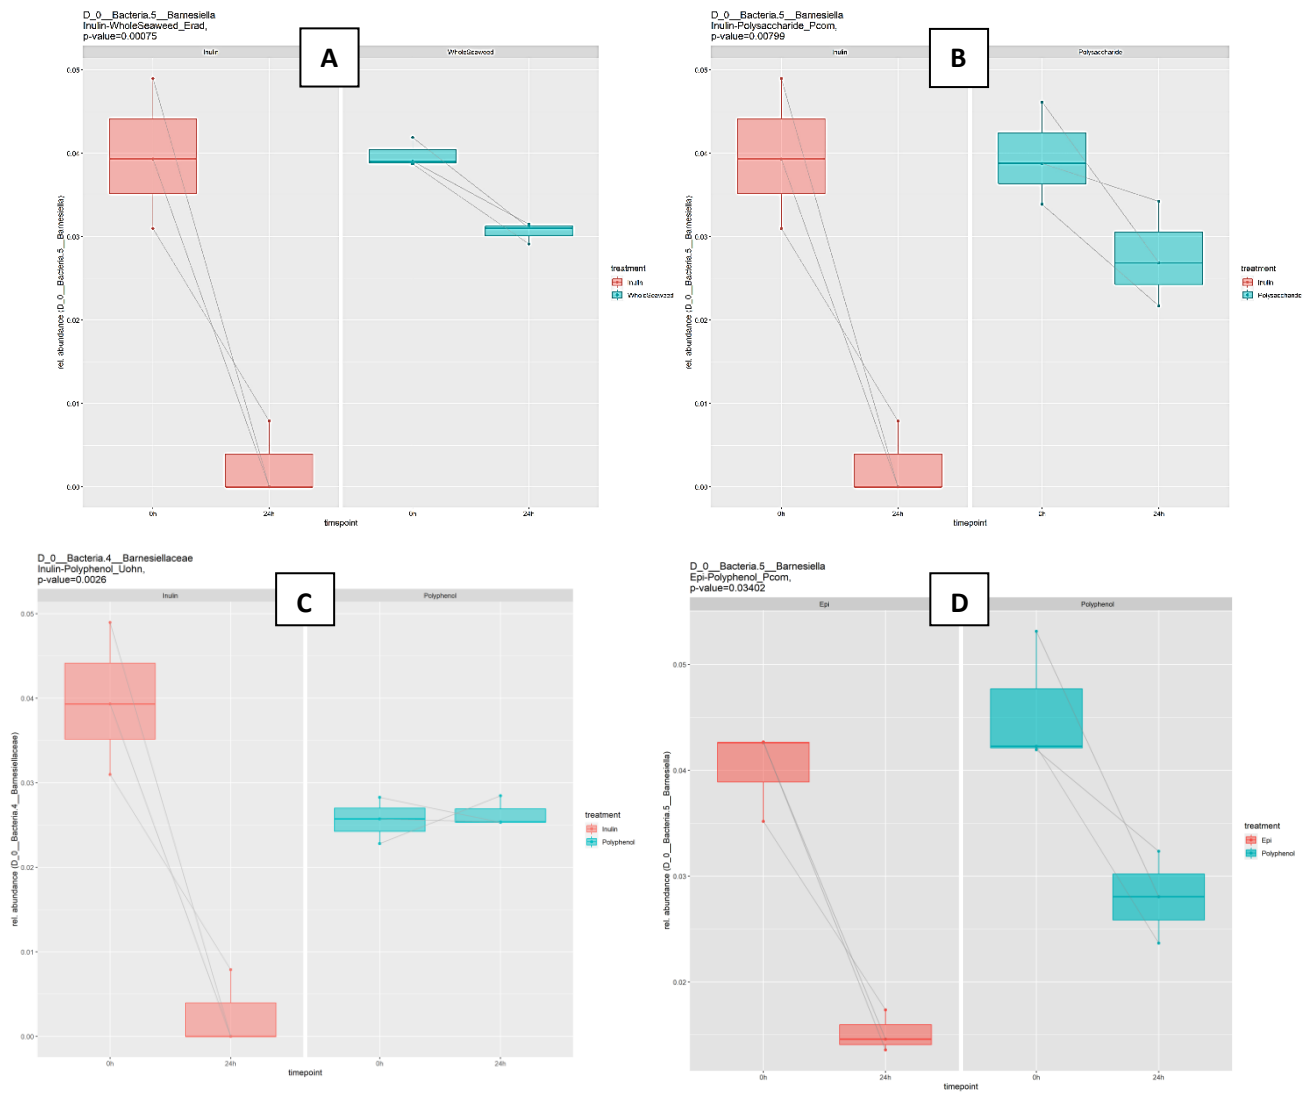

Figure S24. Genus Barnesiella abundance was enhanced in all WH, PS and PP ferments compared to INU and EGCG. Shown here are (A) *E. radiata* WH ( $P = 0.00075$ ), (B) *P. comosa* PS ( $P = 0.00799$ ) and (C) *U. ohnoi* PP ( $P = 0.0026$ ) vs INU, and (D) *P. comosa* PP ( $P = 0.03402$ ) vs EGCG

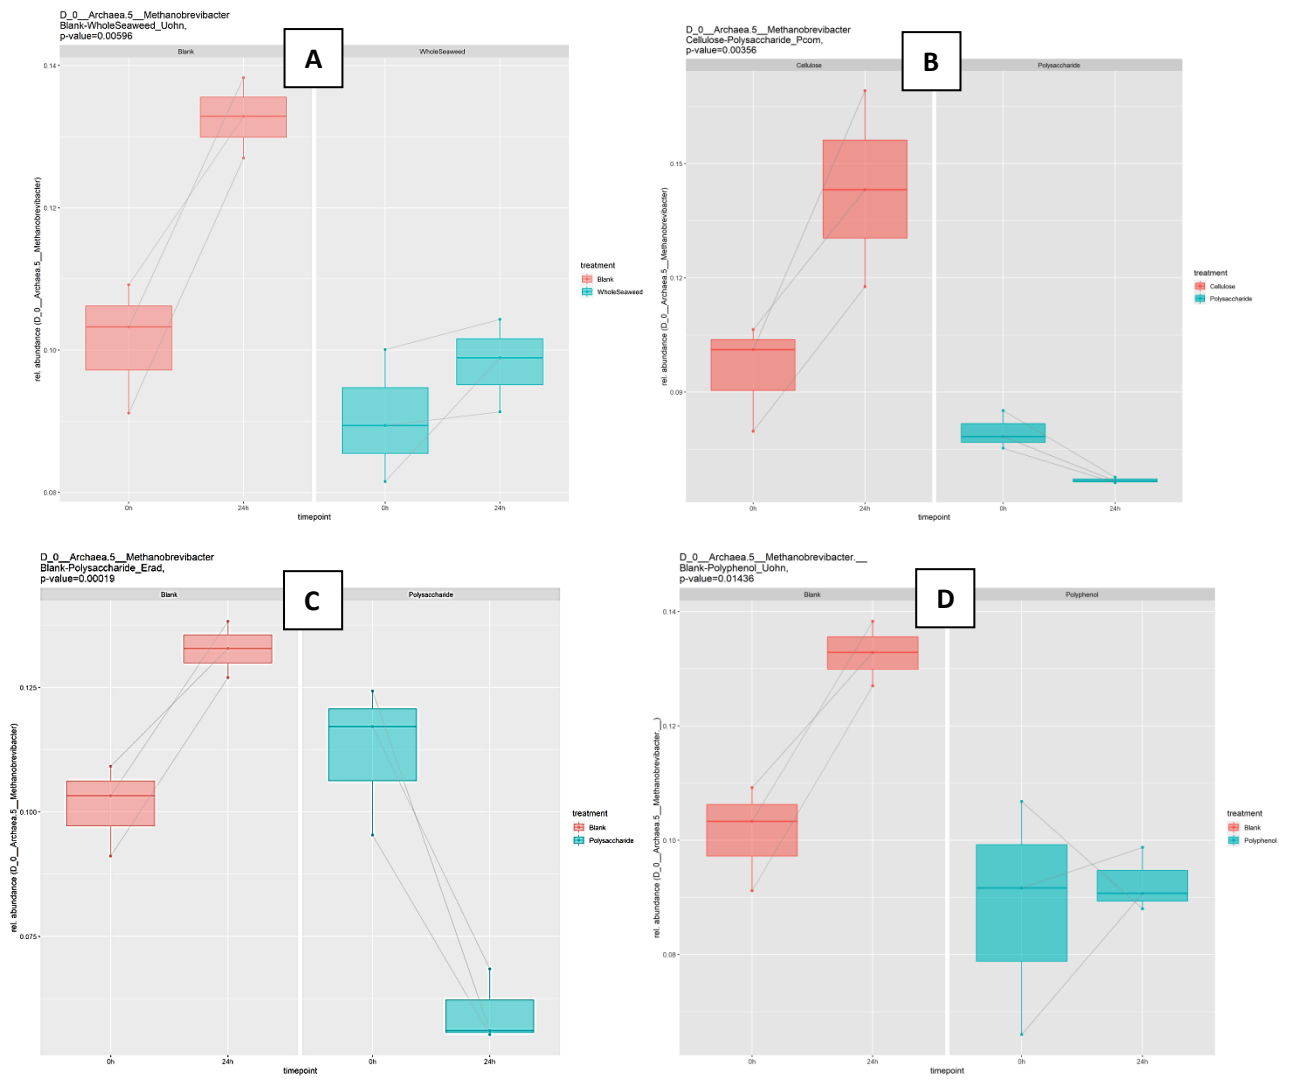

Figure S25. The abundance of *Methanobrevibacter* was reduced by all nine seaweed ferments *vs* the blank and cellulose. Examples shown are (A) *U. ohnoi* WH *vs* blank ( $P = 0.00596$ ), (B) *P. comosa* PS *vs* cellulose ( $P = 0.00356$ ) (C) *E. radiata* PS *vs* blank ( $P = 0.00019$ ) and (D) *U. ohnoi* PS ( $P = 0.01436$ )
